# Supplementary material for: Satellite altimetry and operational oceanography: from Jason-1 to SWOT
Source: Copernicus journal article supplement (doi:10.5194/egusphere-2025-356), 2025-02-05

**Temporal evolution of the RMS of the altimetry data (SLA). The figure shows the same seasonal cycle as observed in the innovation metrics presented in the paper.**

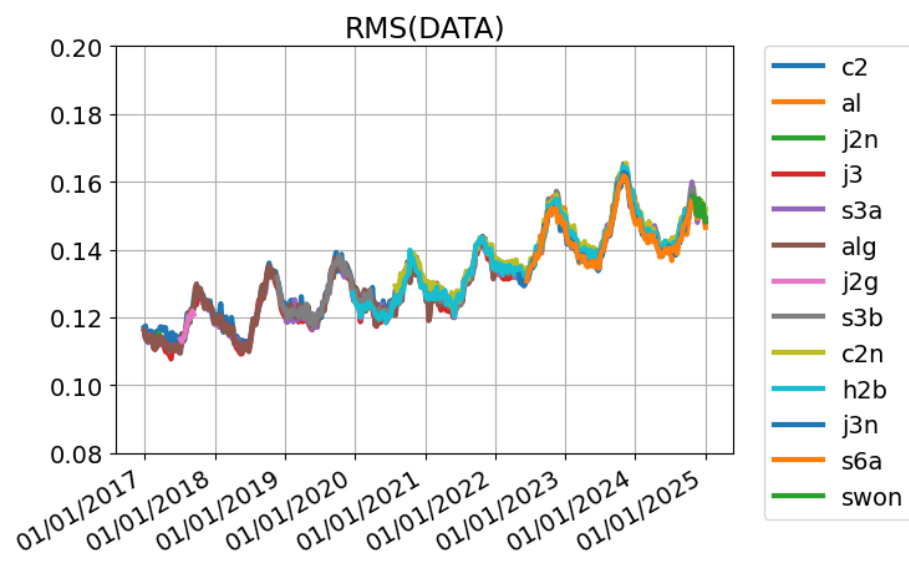

Supplement: Supplementary file [file egusphere-2025-356-AC3-supplement.pdf]
